# Supplementary material
Source: Springer Nature journal article supplement (https://www.springermedizin.de/resource/supplementary/13054_2011_9707_MOESM4_ESM.pdf/9706858)

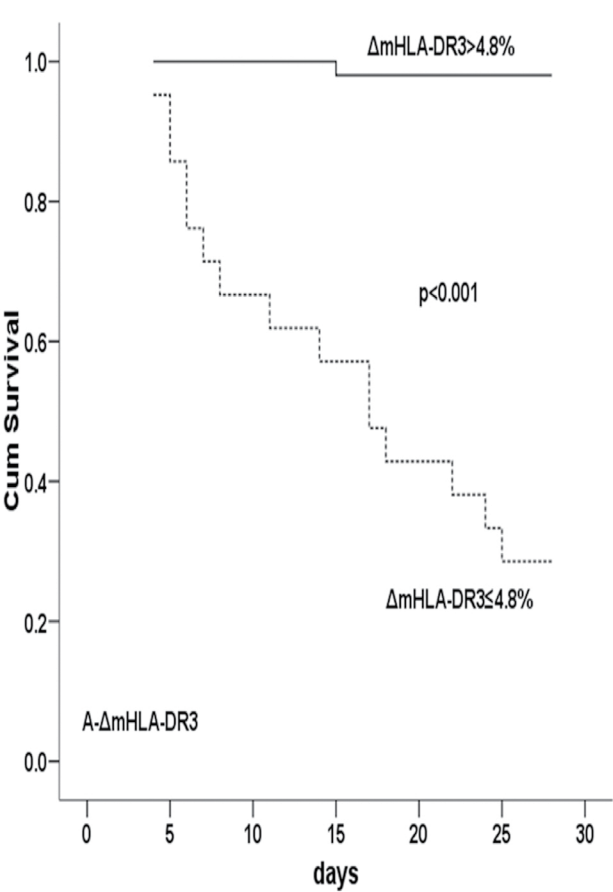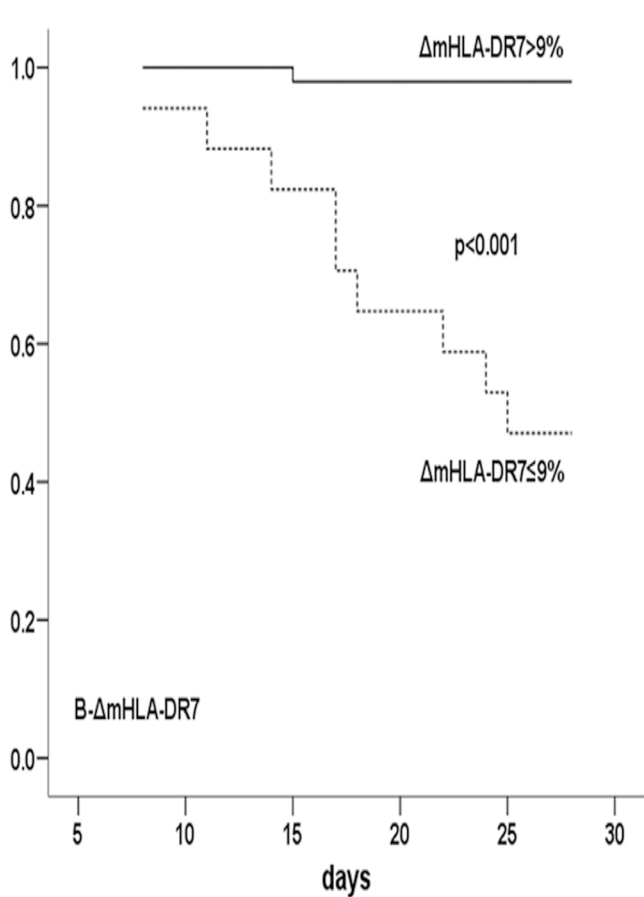

Supplement: MOESM4 [file 9706858]
